# Supplementary material
Source: ML conference proceedings conference paper supplement (https://openreview.net/forum?id=dUiMNQHYXG)

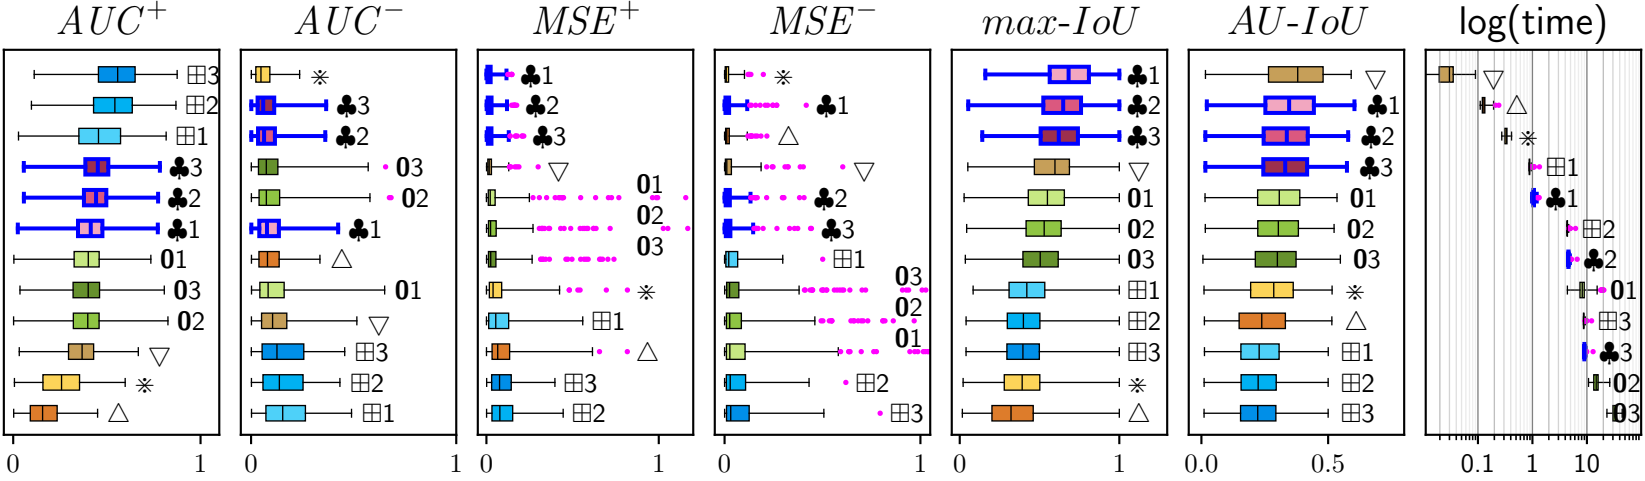

Supplement: supplementary_material [file attachment]

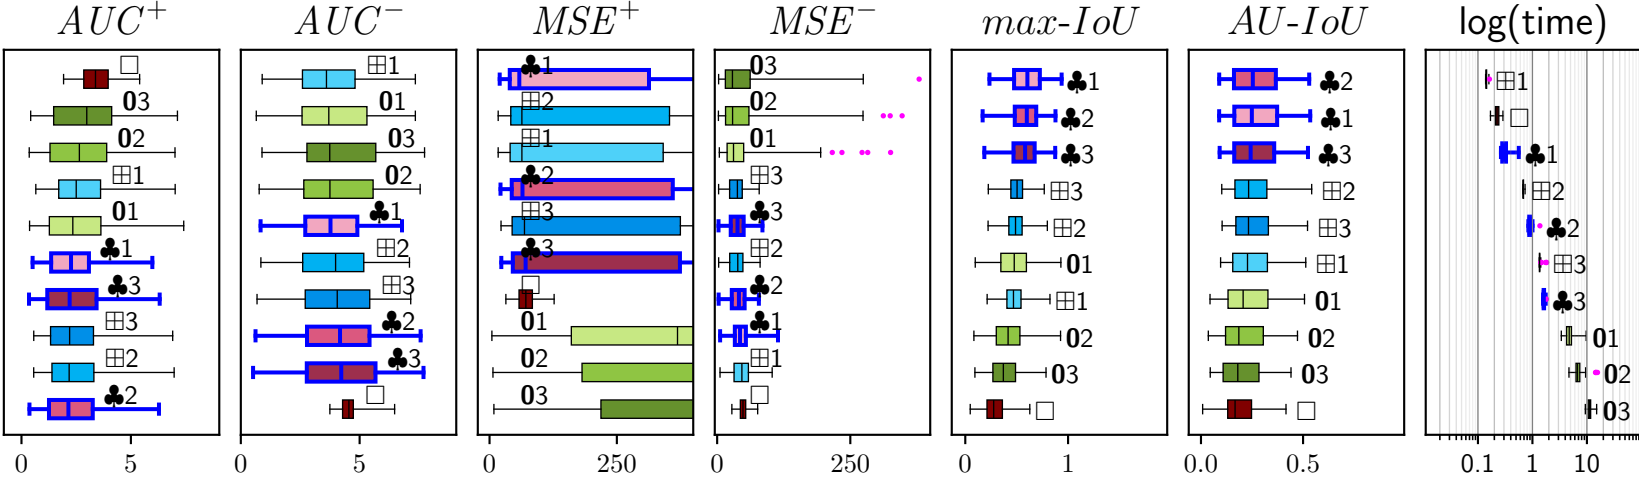

Supplement: supplementary_material [file attachment]

$AUC^+$ 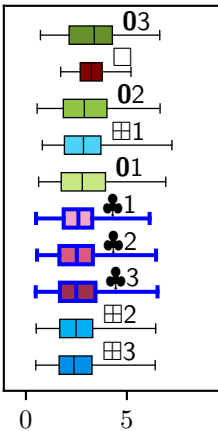 $AUC^-$ 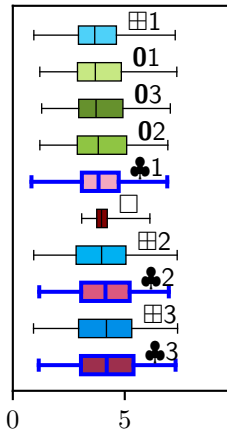 $MSE^+$ 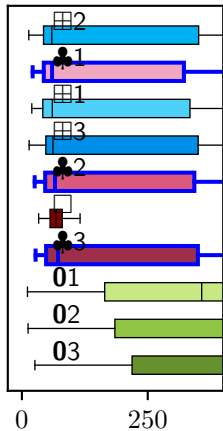 $MSE^-$ 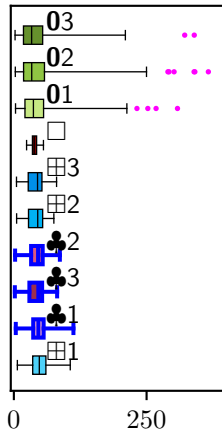 $max-IoU$ 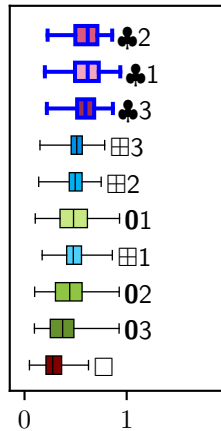 $AU-IoU$ 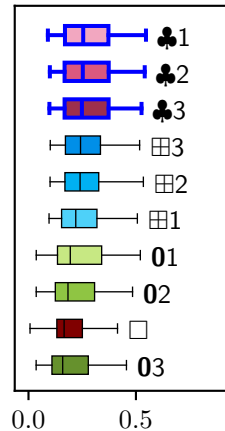

log(time)

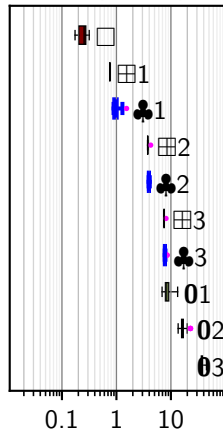

Supplement: supplementary_material [file attachment]

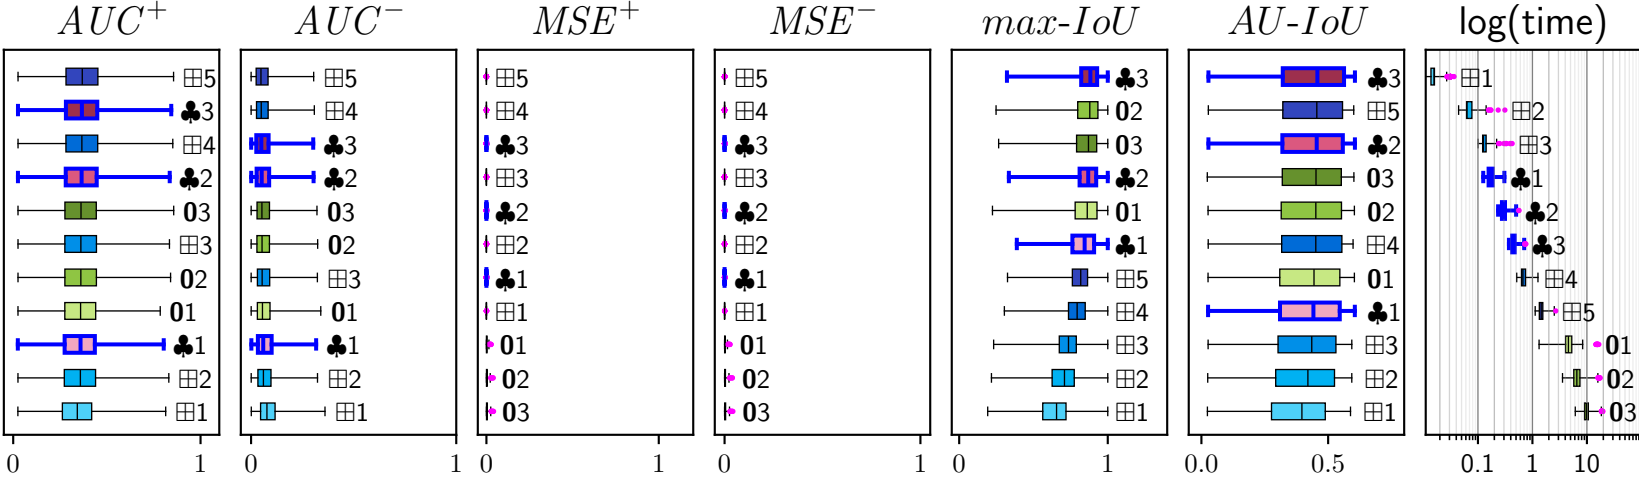

Supplement: supplementary_material [file attachment]

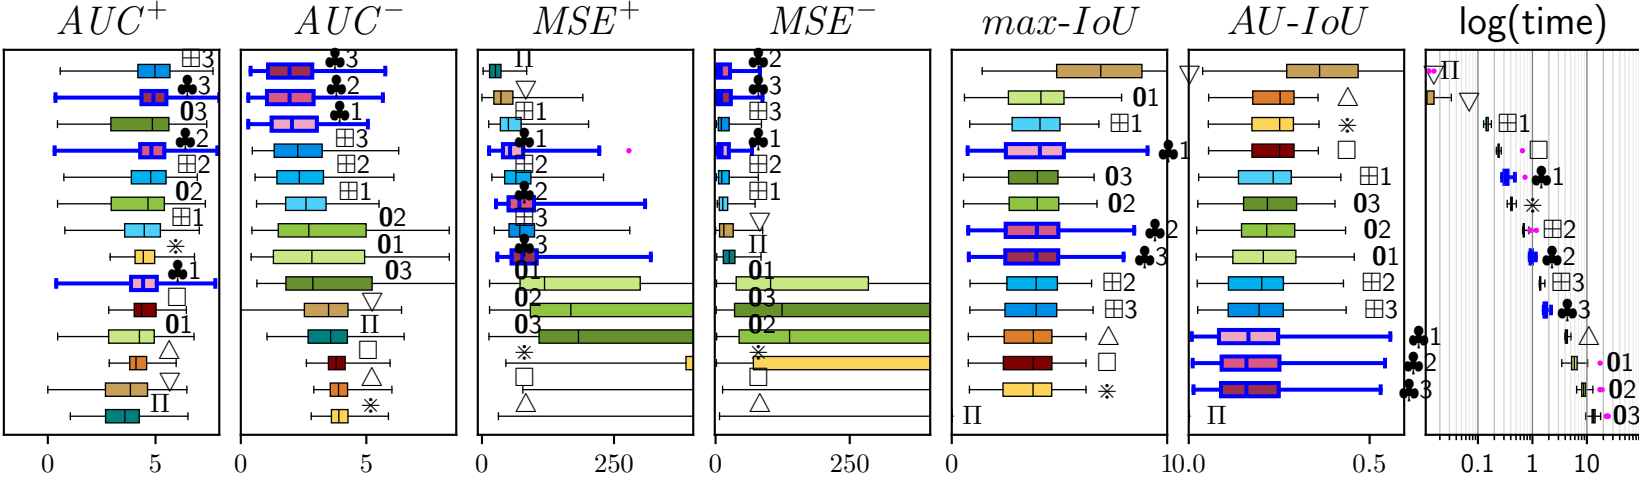

Supplement: supplementary_material [file attachment]

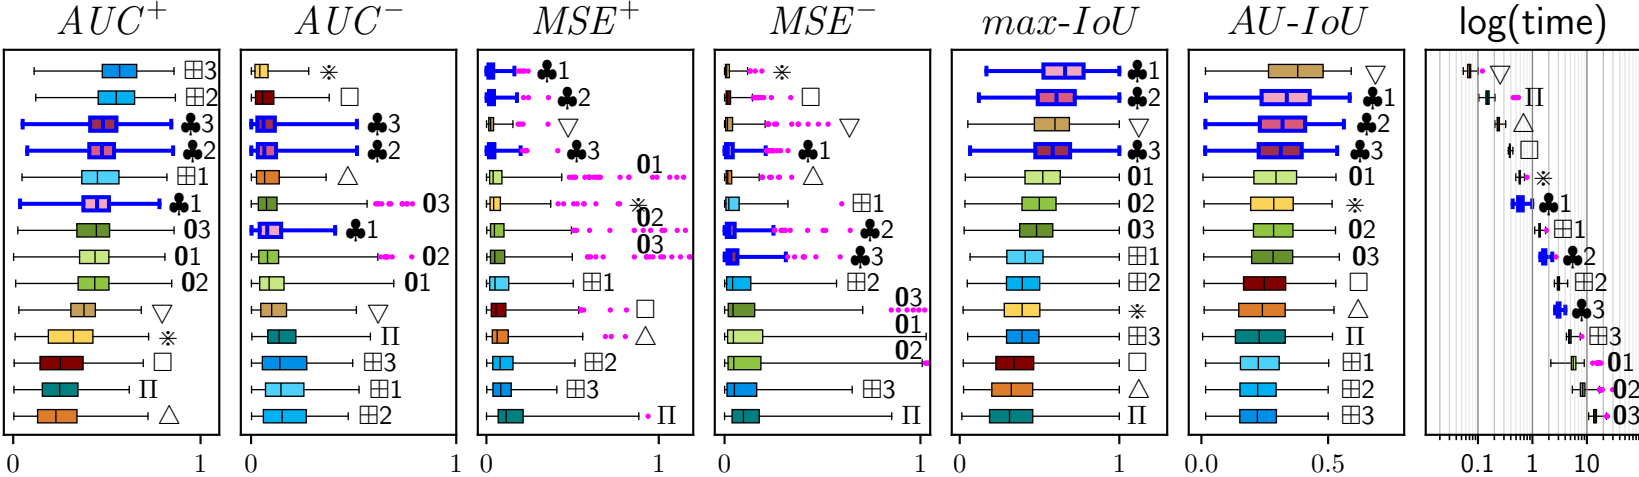

Supplement: supplementary_material [file attachment]

$AUC^+$ 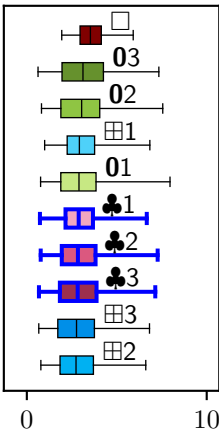 $AUC^-$ 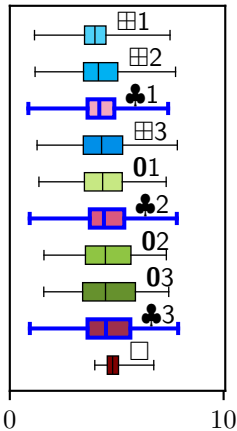 $MSE^+$ 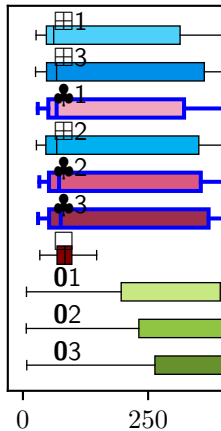 $MSE^-$ 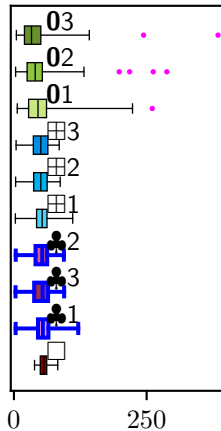 $max-IoU$ 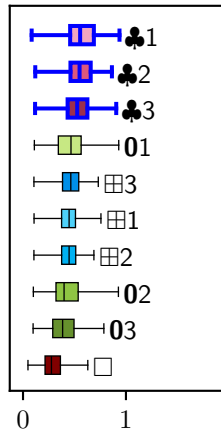 $AU-IoU$ 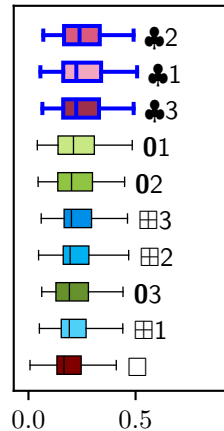 $\log(\text{time})$ 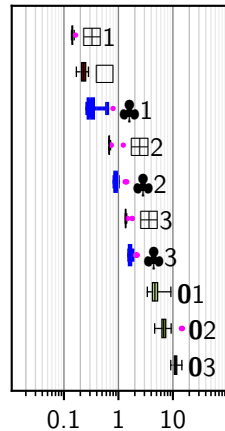

Supplement: supplementary_material [file attachment]

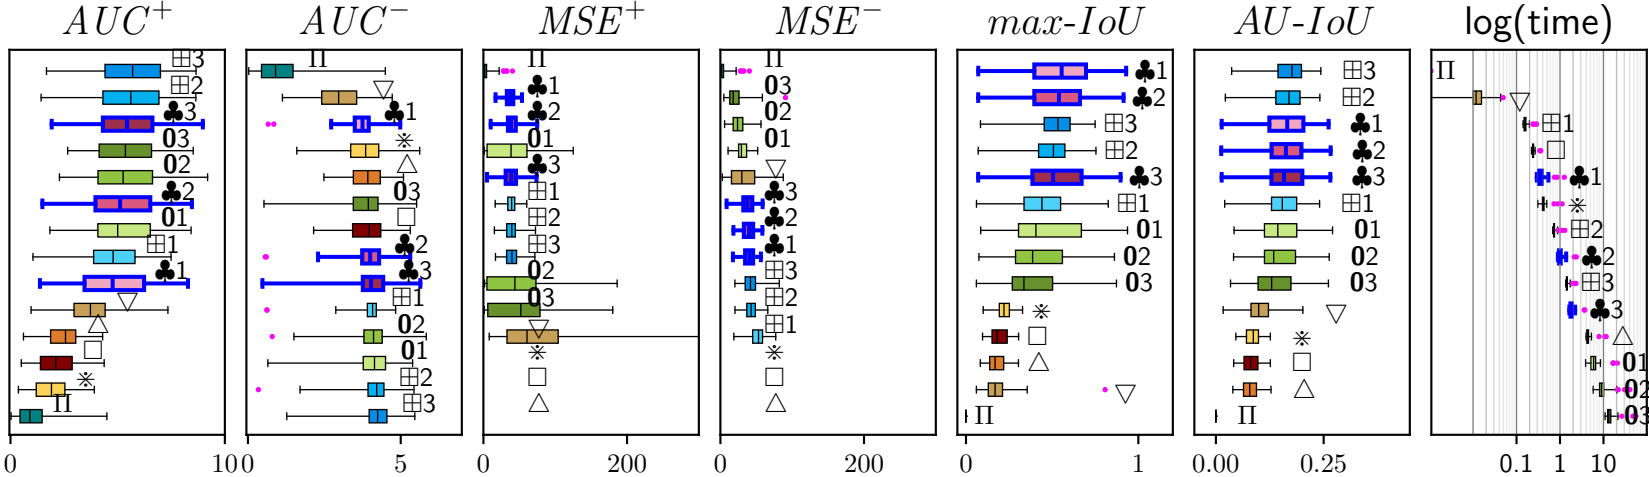

Supplement: supplementary_material [file attachment]

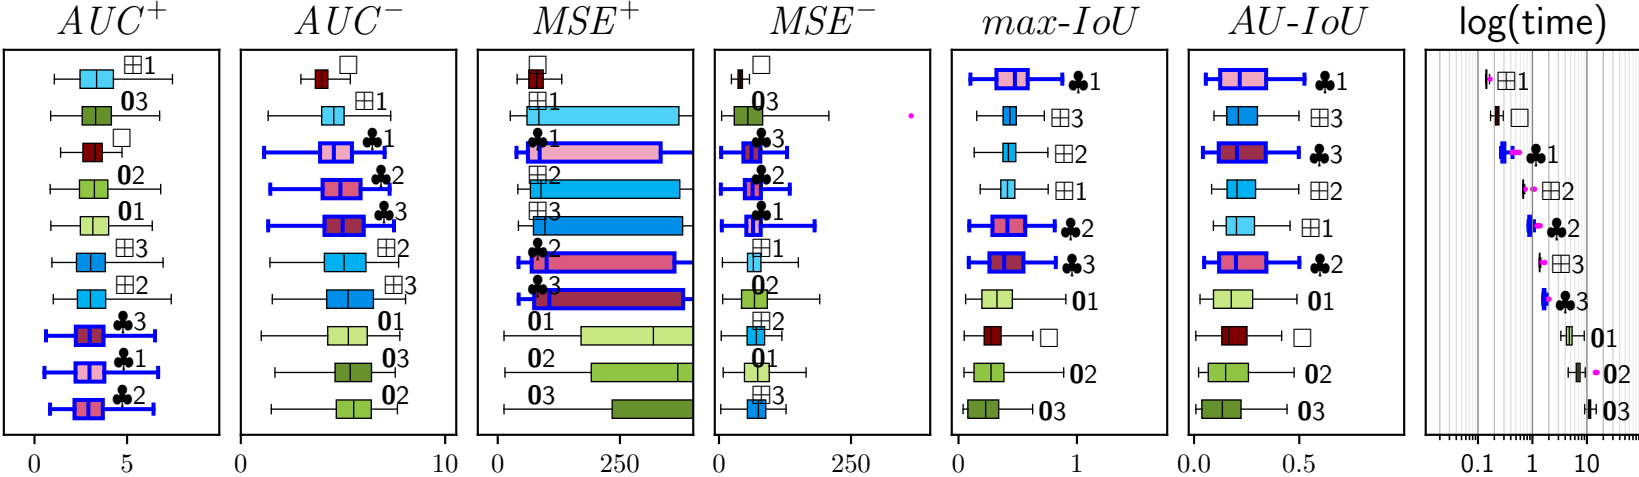

Supplement: supplementary_material [file attachment]

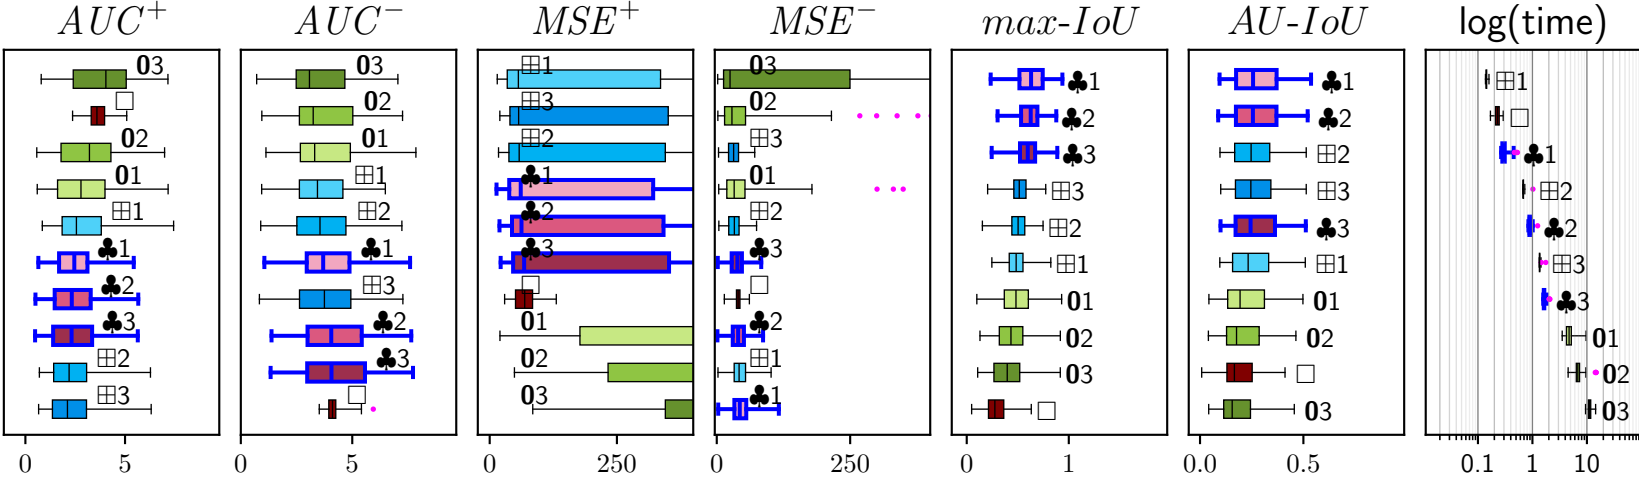

Supplement: supplementary_material [file attachment]

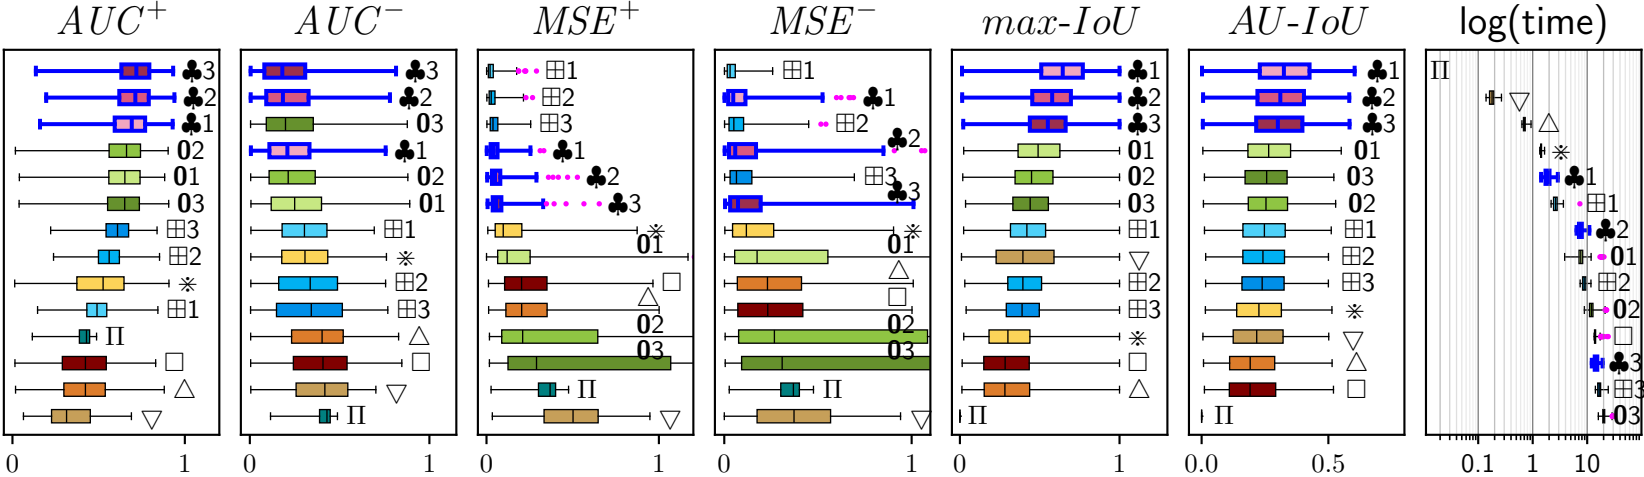

Supplement: supplementary_material [file attachment]

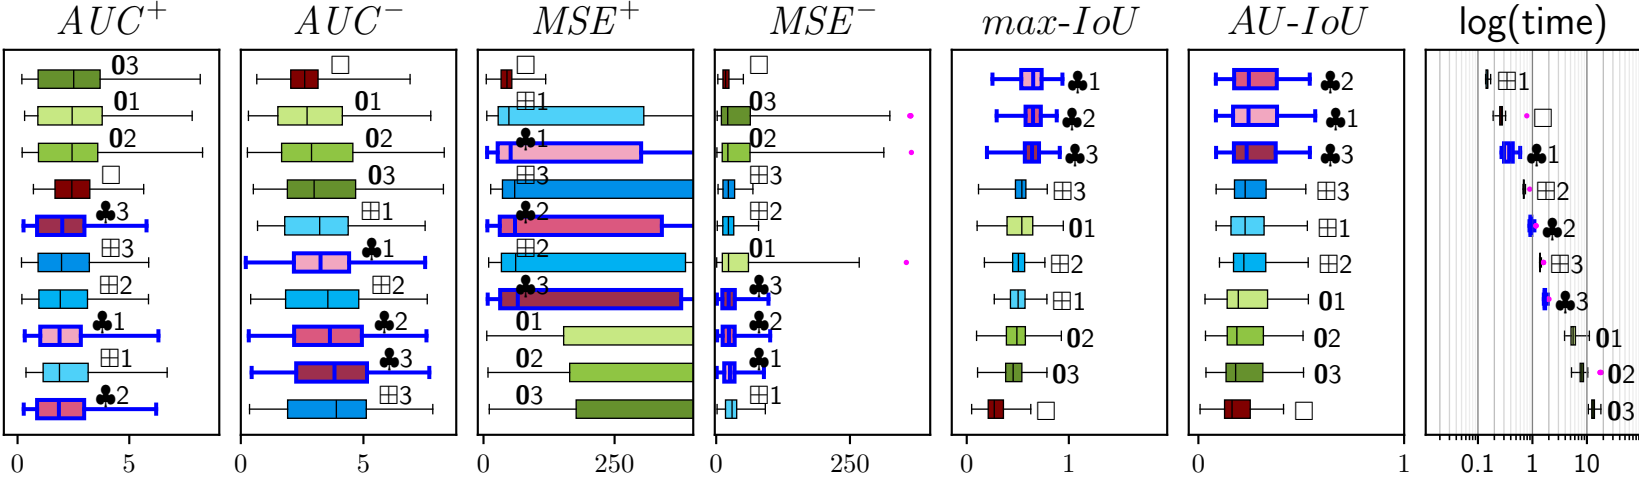

Supplement: supplementary_material [file attachment]

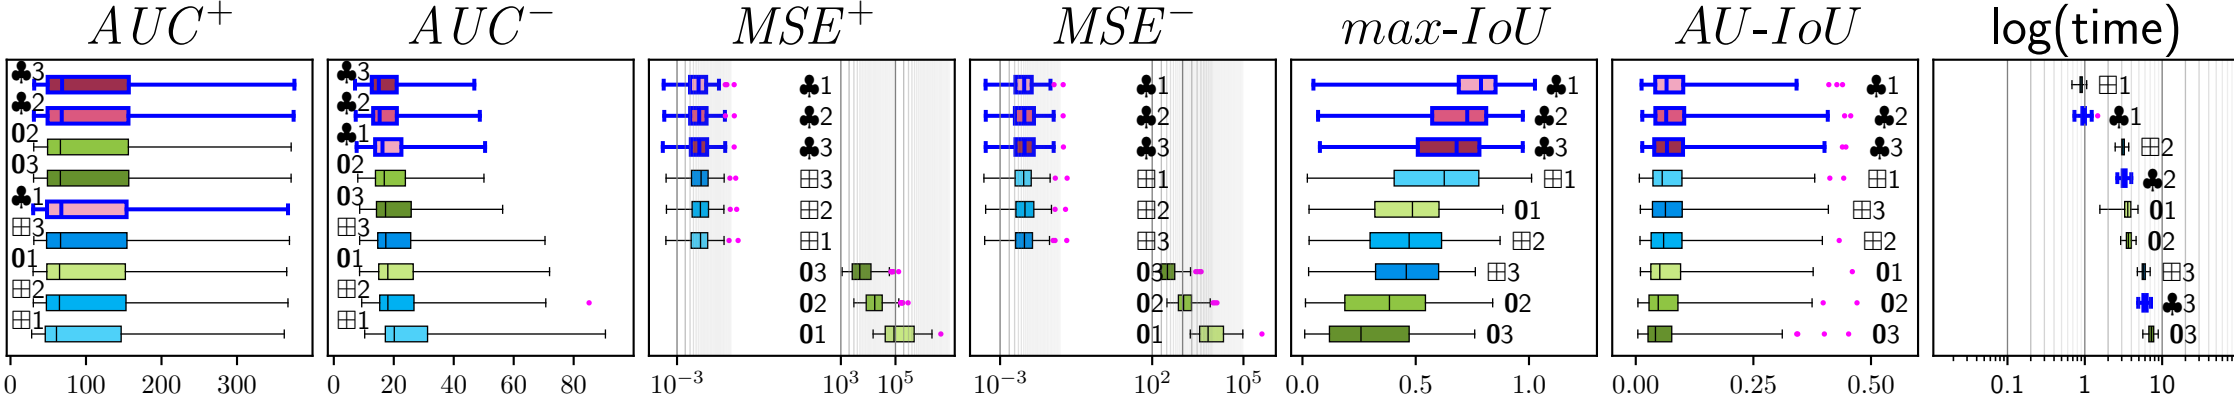

Supplement: supplementary_material [file attachment]

$AUC^+$ 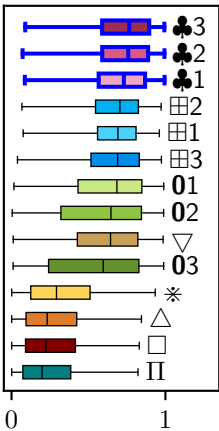 $AUC^-$ 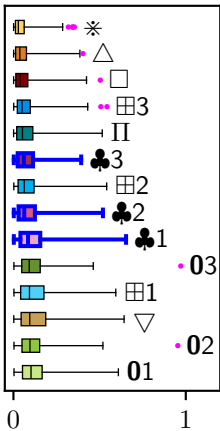 $MSE^+$ 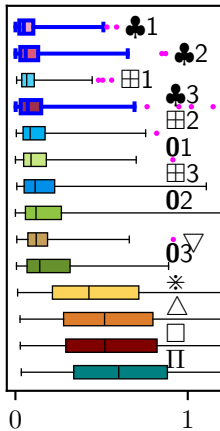 $MSE^-$ 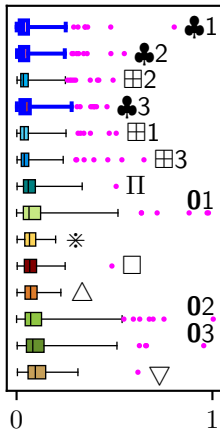 $max-IoU$ 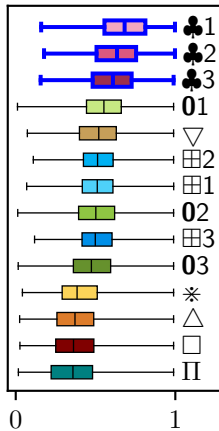 $AU-IoU$ 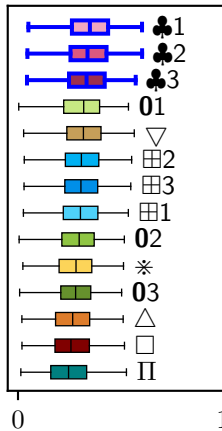

log(time)

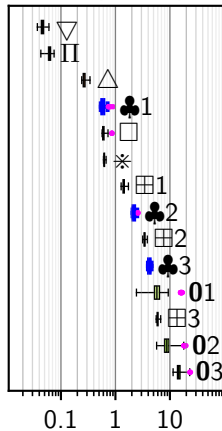

Supplement: supplementary_material [file attachment]



Supplement: supplementary_material [file attachment]
